# Supplementary material for: Identification and genetic diversity analysis of a male-sterile gene (MS1) in Japanese cedar (Cryptomeria japonica D. Don)
Source: PubMed Central journal article supplement (PMC7810747; doi:10.1038/s41598-020-80688-1), 2021-01-15
Supplement: 41598_2020_80688_MOESM1_ESM.pdf [file 41598_2020_80688_MOESM1_ESM.pdf]

**Identification and genetic diversity analysis of a male-sterile gene (*MSI*) in Japanese cedar (*Cryptomeria japonica* D. Don)**

Yoichi Hasegawa<sup>1§</sup>, Saneyoshi Ueno<sup>1\*</sup>, Fu-Jin Wei<sup>1§</sup>, Asako Matsumoto<sup>1</sup>, Kentaro Uchiyama<sup>1</sup>, Tokuko Ujino-Ihara<sup>1</sup>, Tetsuji Hakamata<sup>2</sup>, Takeshi Fujino<sup>3</sup>, Masahiro Kasahara<sup>3</sup>, Takahiro Bino<sup>4</sup>, Katsushi Yamaguchi<sup>4</sup>, Shuji Shigenobu<sup>4</sup>, Yoshihiko Tsumura<sup>5</sup>, Yoshinari Moriguchi<sup>6\*</sup>

- 1 Department of Forest Molecular Genetics and Biotechnology, Forestry and Forest Products Research Institute, Forest Research and Management Organization, Tsukuba, Ibaraki, Japan.
- 2 Forestry and Forest Products Research Center, Shizuoka Prefectural Research Institute of Agriculture and Forestry, Hamamatsu, Shizuoka, Japan.
- 3 Graduate School of Frontier Sciences, The University of Tokyo, Kashiwa, Chiba, Japan
- 4 National Institute for Basic Biology, Okazaki, Aichi, Japan.
- 5 Faculty of Life and Environmental Sciences, University of Tsukuba, Tsukuba, Ibaraki, Japan.
- 6 Graduate School of Science and Technology, Niigata University, Niigata, Niigata, Japan.
