# Supplementary material for: Identification and genetic diversity analysis of a male-sterile gene (MS1) in Japanese cedar (Cryptomeria japonica D. Don)
Source: PubMed Central journal article supplement (PMC7810747; doi:10.1038/s41598-020-80688-1), 2021-01-15
Supplement: 41598_2020_80688_MOESM2_ESM.pdf [file 41598_2020_80688_MOESM2_ESM.pdf]

| Haplotypes                                               | Wild Type Ajigasawa20_1                                                                                                                                                                                                  | ms1 Ooi-7_1 (30bp deletion )                                                                                                                                                                                   |
|----------------------------------------------------------|--------------------------------------------------------------------------------------------------------------------------------------------------------------------------------------------------------------------------|----------------------------------------------------------------------------------------------------------------------------------------------------------------------------------------------------------------|
| Peptide sequence                                         | MAAIVRALIIFVLMVAESVMTQQTDAADCTDPIVSLSPCLSYMTRSAKLSIPDDDC<br>CDSLATVINTHAGCLCELVSRDDFLGFPINQTITLSLPSTCDIQYPRELDQCIVVLPSS<br>DGPVVQPGSNPPRRLFHPEAPSPALEAVPPVLEAPPMEVDPDQDDSPFPNVSIA <b>G</b><br>ALFTQSLRLRFWGSLLTAILTVGYLH | MAAIVRALIIFVLMVAESVMTQQTDAADCTDPIVSLSPCLSYMTRSAKLSIPDDDC<br>CDSLATVINTHAGCLCELVSRDDFLGFPINQTITLSLPSTCDIQYPRELDQCIVVLPSS<br>DGPVVQPGSNPPRRLFHPEAPSPALEAVPPVLEAPPMEVDPDQDDSPFPNVSIA <b>G</b><br>ALFTQSLRLRFWGSLL |
| Prediction of potential C-terminal GPI-modification site | Potential GPI-modification site was found.<br>Quality of the site ..... : S<br>Sequence position of the omega-site : <b>176</b><br>Score of the best site ..... : -3.28 (PValue = 2.791270e-03)                          | <b>None</b> potential GPI-modification site was found.<br>Among all positions checked, sequence position 160 had the best score.                                                                               |

Figure S1 Results of a 30-bp deletion on the loss of potential GPI-modification sites. Peptide sequences of Ajigasawa20\_1 and Ooi-7\_1 were tested for prediction of potential GPI-modification site using big-PI Plant Predictor (Eisenhaber *et al.* 2003).

#### Reference

Eisenhaber, B. *et al.* Glycosylphosphatidylinositol lipid anchoring of plant proteins. Sensitive prediction from sequence- and genome-wide studies for Arabidopsis and rice. *Plant Physiol.* **133**, 1691–1701 (2003).
