# Supplementary material for: Identification and genetic diversity analysis of a male-sterile gene (MS1) in Japanese cedar (Cryptomeria japonica D. Don)
Source: PubMed Central journal article supplement (PMC7810747; doi:10.1038/s41598-020-80688-1), 2021-01-15
Supplement: 41598_2020_80688_MOESM4_ESM.pdf [file 41598_2020_80688_MOESM4_ESM.pdf]

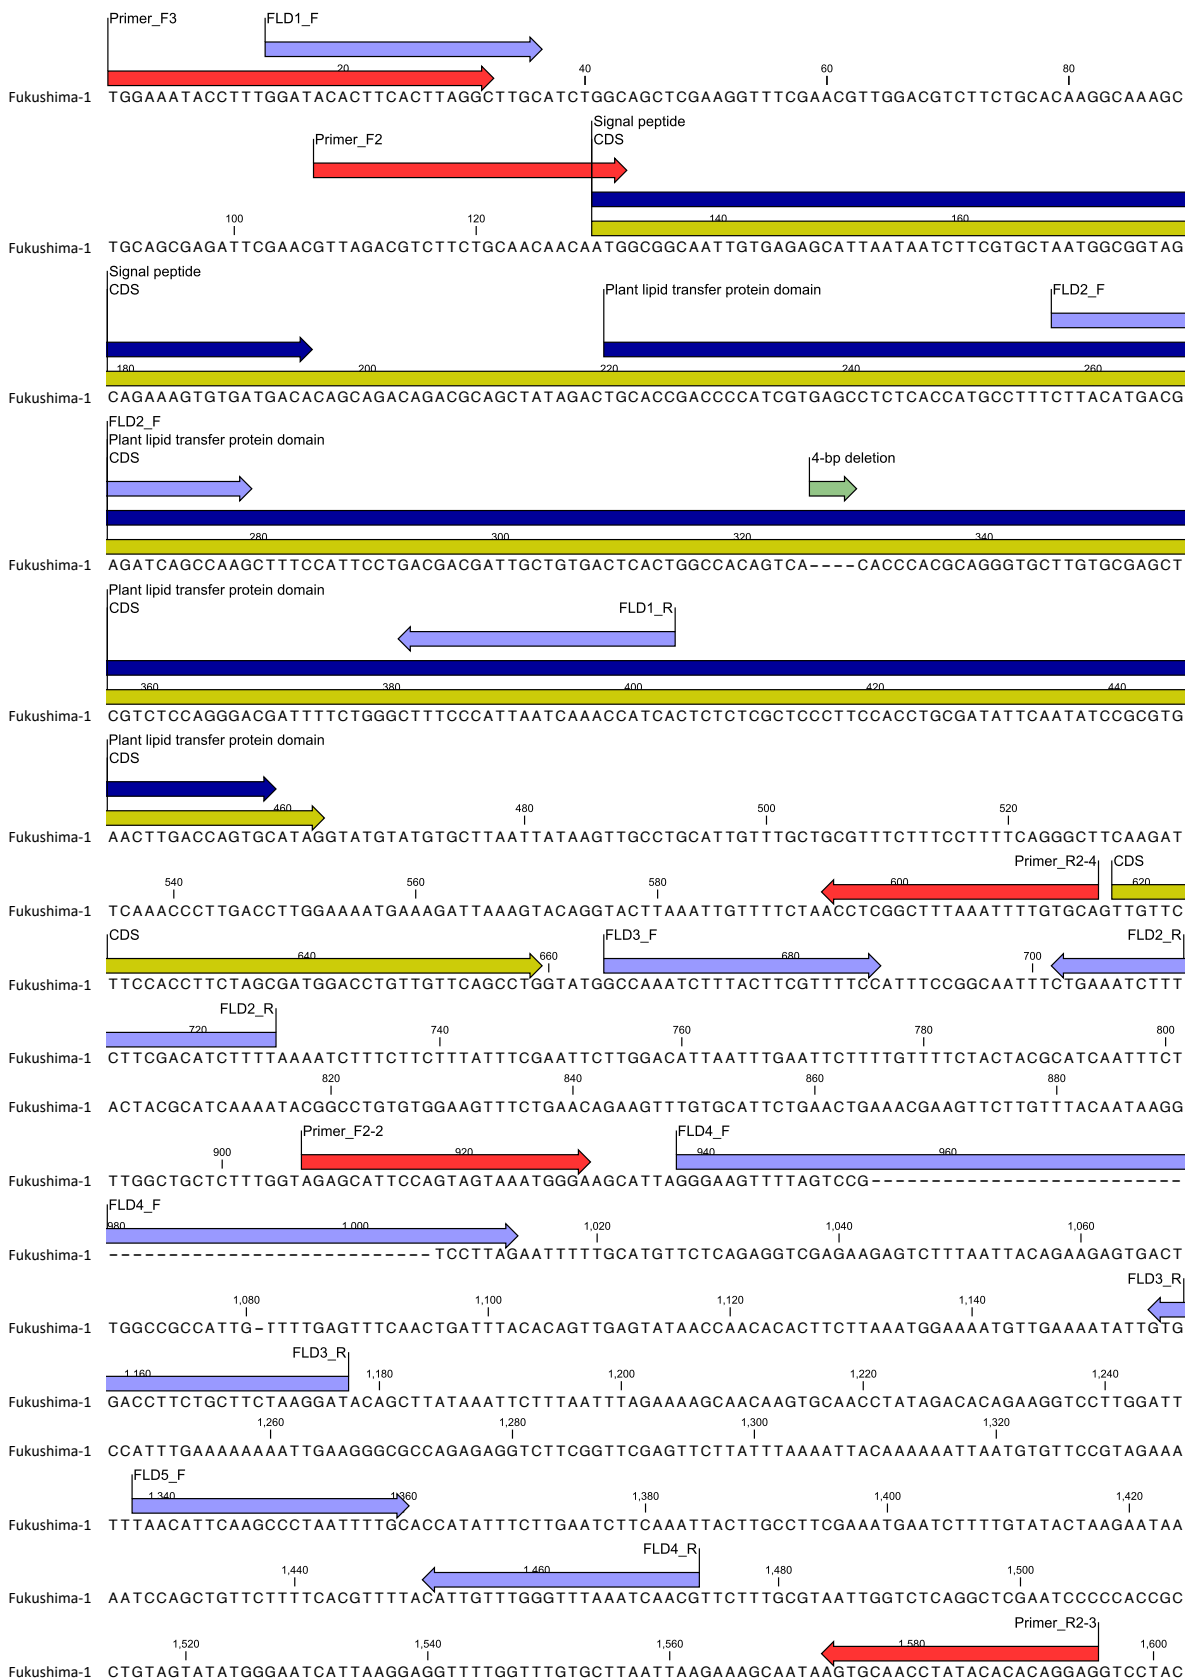

Figure S3 Genomic DNA sequence of CJt020762 for Fukushima-1 and primer site position.

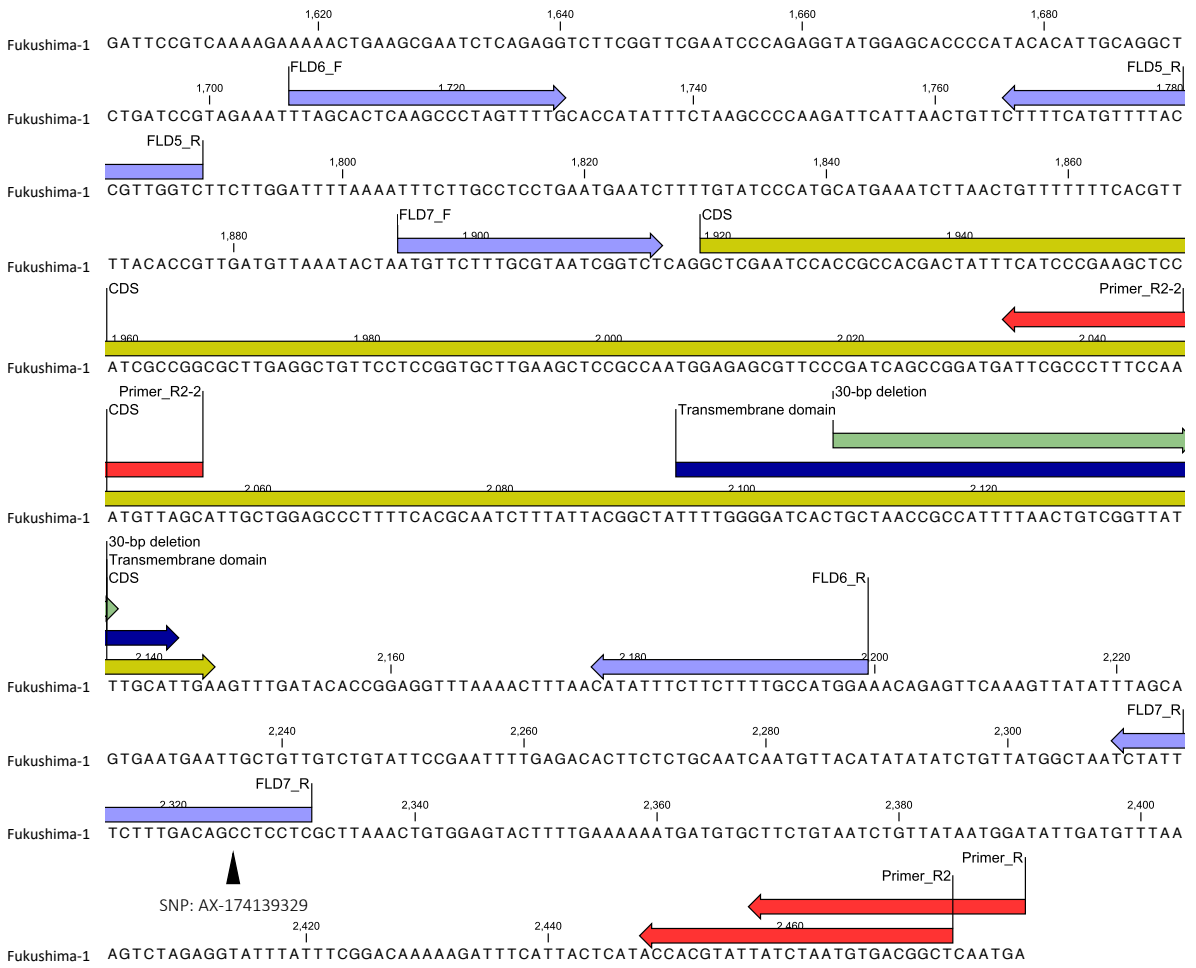

Figure S3 (continued)
